# Supplementary material
Source: publisher figshare collection journal article supplement (https://tandf.figshare.com/articles/dataset/_/7227284)
Supplement: Supplementary file 1 [file 1]

# Facies Distribution Map of Sossusvlei (Middle of Namib Desert, Namibia)

Troidl A. \*, Zimmermann R. \*\*, Stollhofen H. \*, Caracciolo L. \*, Garzanti E. \*\*\*, Andreani L. \*\*

\* GeoZentrum Nordbayern, Friedrich-Alexander-University (FAU) Erlangen-Nürnberg, Schloßgarten 5, 91054 Erlangen, Germany

\*\* Helmholtz-Zentrum Dresden-Rossendorf, Helmholtz Institute Freiberg for Resource Technology, Division „Exploration Technology“, Chemnitz Str. 40, 09599 Freiberg, Germany

\*\*\* Laboratory for Provenance Studies, Department of Earth and Environmental Sciences, University of Milano-Bicocca, Milano 20126, Italy

This map shows the facies distribution pattern of fluvially influenced aeolian sediments. The Sossusvlei playa-lake at the eastern flank of the Namib Sand Sea (central Namibia), provides an excellent example of sedimentological processes associated with an ephemeral river repeatedly entering a dune field, becoming dammed by it and finally terminating in a flat interdune playa called 'vlei'. The spectrum of aeolian and fluvial processes generates a complex interplay of sedimentary facies, which make a facies map a prerequisite to better understand the mutual relationships and distribution pattern of the sediments. The map was created on the basis of a World View 3 satellite image, using a supervised classification algorithm trained by field observations, a combination of Principal Component Analysis, band ratios, texture and geomorphologic indices. The following facies were distinguished: modern aeolian sand, bypass surface, mud pool/mud drape, heavy mineral lag, fluvial aeolian reworked and fossil dune remnant.

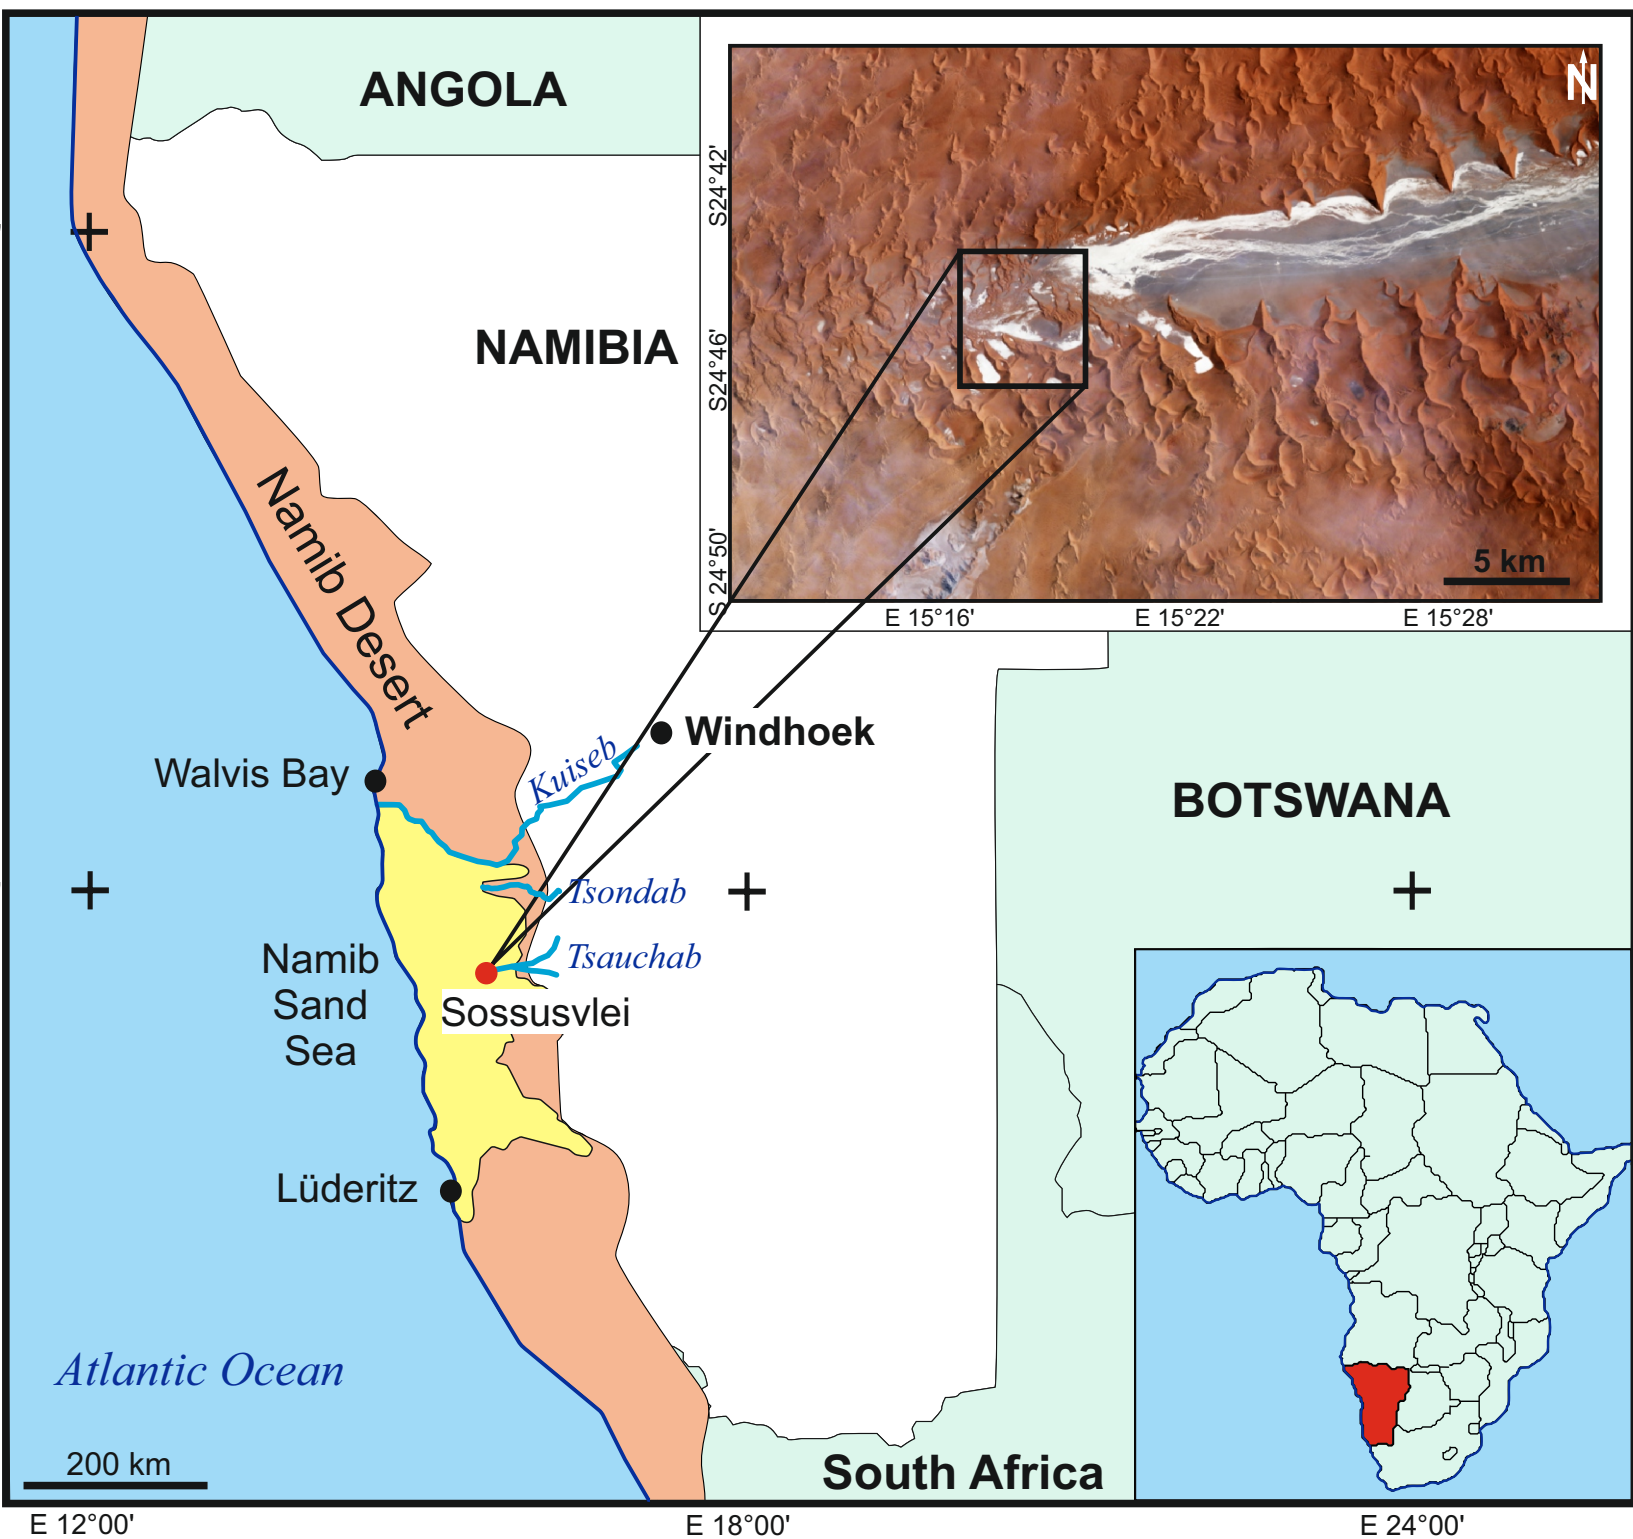

## Sedimentological facies in the field: the scale is 20 cm

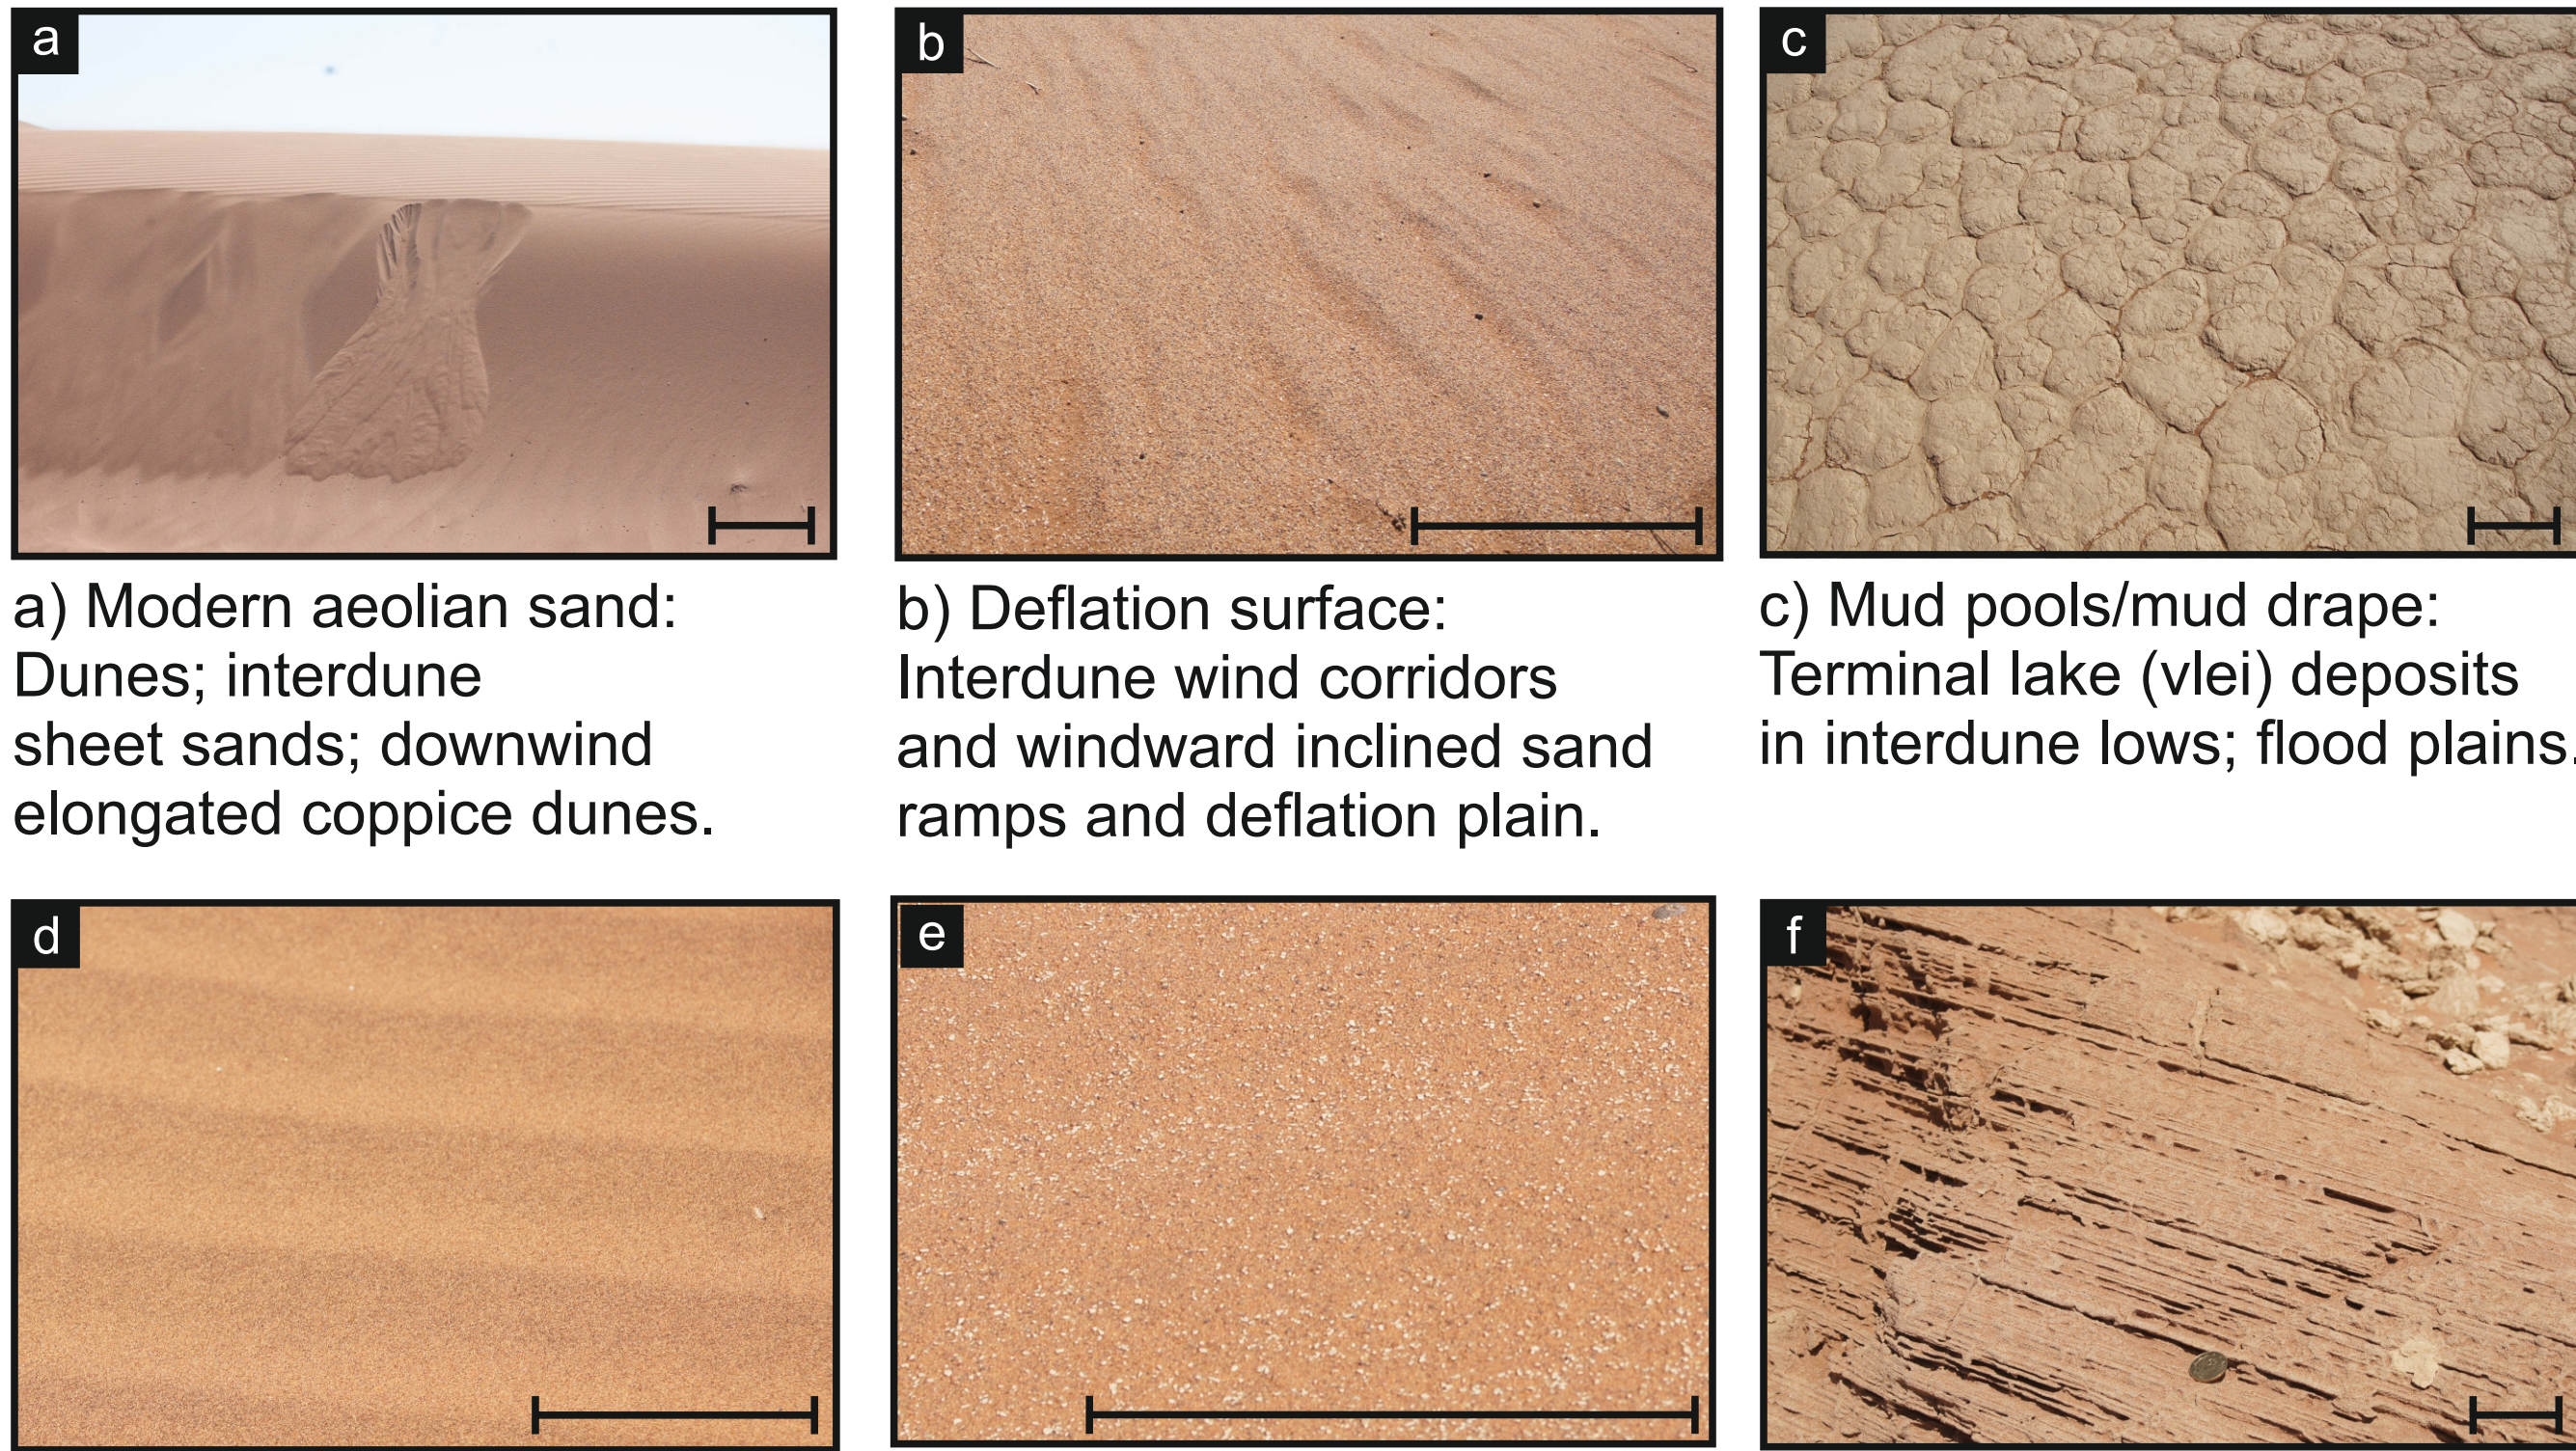

## Legend

- |                          |                     |
|--------------------------|---------------------|
| Modern aeolian sand      | Fossil dune remnant |
| Deflation surface        | Vegetation          |
| Mud pool/mud drape       | Shadow              |
| Heavy mineral lag        |                     |
| Fluvial aeolian reworked |                     |

Coordinate System: WGS84  
UTM zone: 33S  
Facies distribution based on supervised classification of Worldview 3 satellite data.  
© Journal of Maps
